# Supplementary material for: Aflatoxin B1 exposure and liver cirrhosis in Guatemala: a case–control study
Source: PubMed Central journal article supplement (PMC7342465; doi:10.1136/bmjgast-2020-000380), 2020-07-07

## Supplemental materials

Figure S1. Flow chart of inclusion and exclusion criteria for the cases and controls

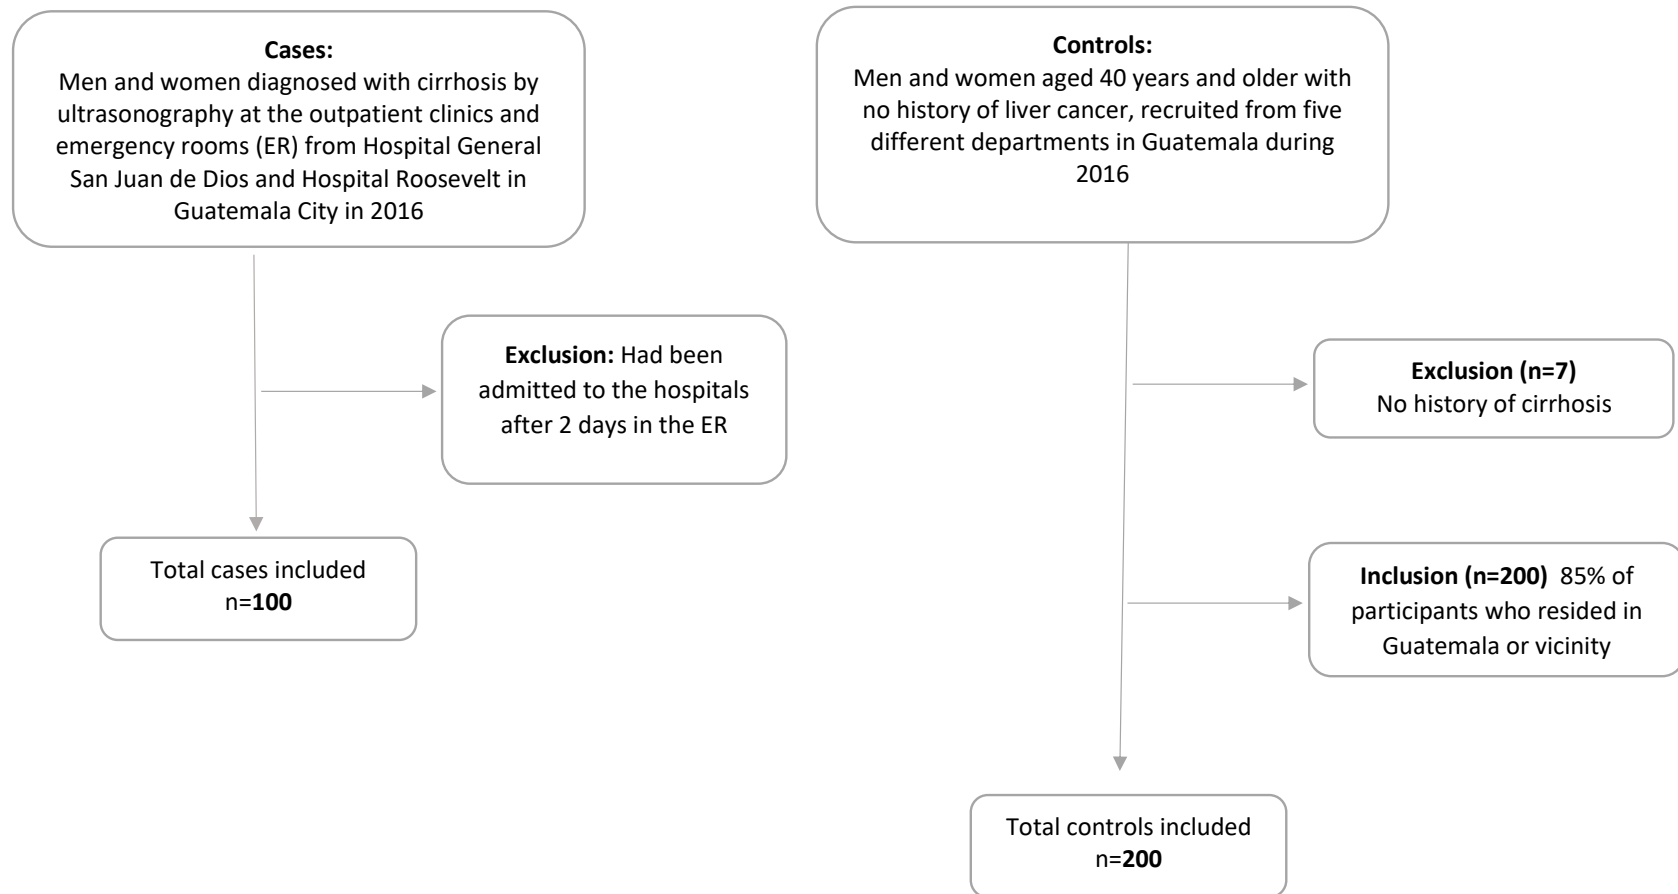

Supplement: bmjgast-2020-000380supp001.pdf [file bmjgast-2020-000380supp001.pdf]
